# Supplementary material for: Porcine TRIM21 Enhances Porcine Circovirus 2 Infection and Host Immune Responses, But Inhibits Apoptosis of PCV2-Infected Cells
Source: MDPI journal article supplement (doi:10.3390/v14010156), 2022-01-15
Supplement: s1 [file s1]

# **Porcine TRIM21 enhances PCV2 infection and immune responses but inhibits apoptosis in PCV2-infected cells**

**Lin Yang<sup>#</sup>, Xiaohua Liu<sup>#</sup>, Liying Zhang<sup>#</sup>, Xue Li, Xinwei Zhang, Guoyu Niu, Weilong Ji, Si Chen, Hongsheng Ouyang, Linzhu Ren\***

College of Animal Sciences, Key Lab for Zoonoses Research, Ministry of Education, Jilin University, 5333 Xi'an Road, Changchun 130062, China

Running title: Porcine TRIM21 increases PCV2 infection

✉ Correspondence: renlz@jlu.edu.cn; Tel.: +0086-431-87836175

\* These authors contributed equally to this work.

This file includes:

Supplemental Table S1

Figures S1 to S6

# Supplemental Table S1

Supplemental Table S1 Sequence of primers and oligonucleotides

| Primer and oligonucleotide | Sequence (5'-3')                                                         | Length (bp) | Annealing temperature |
|----------------------------|--------------------------------------------------------------------------|-------------|-----------------------|
| TRIM2-F                    | TGACATCCATTCCACCTTTGA                                                    | 111         | 60                    |
| TRIM2-R                    | GACTGCAGGACTTTGTGTTTG                                                    |             |                       |
| TRIM16-F                   | AGCGTCTACATCGGACTCAA                                                     | 97          | 60                    |
| TRIM16-R                   | CCTTGTAATCCTGCAGCAACT                                                    |             |                       |
| TRIM21-F                   | CCGTCTCCTTCTACAACATCAG                                                   | 121         | 60                    |
| TRIM21-R                   | GCATTCTTCCACCGTCATTG                                                     |             |                       |
| TRIM24-F                   | ATACTTACGTCCCTGCTCTTG                                                    | 196         | 60                    |
| TRIM24-R                   | GGTCGTCCTCTTTCCTTGT                                                      |             |                       |
| TRIM33-F                   | CAGCTCCTGGTTATACTCCTAATG                                                 | 105         | 60                    |
| TRIM33-R                   | GAAGTCGAAGCTGTGCTAAGT                                                    |             |                       |
| TRIM37-F                   | GAGGGAGAACTCATGGAAGATG                                                   | 115         | 60                    |
| TRIM37-R                   | TGGTAGCAGCAGAGCATAAG                                                     |             |                       |
| TRIM38-F                   | GGTGGGATTTAGGAGTCTGTATG                                                  | 149         | 60                    |
| TRIM38-R                   | CCCTCAGTTGAAGGGAAGTTAG                                                   |             |                       |
| TRIM59-F                   | TCACCTGCCCTGAACATTAC                                                     | 90          | 60                    |
| TRIM59-R                   | GGATGACCATGATGTTGACCTA                                                   |             |                       |
| TRIM21-1F                  | ATGGCCTCAGCACTGCCCTTGGCAAGGATG                                           | 753         | 56                    |
| TRIM21-1R                  | CTTCCAGGACACTCTTCACCTCCTGTAG                                             |             |                       |
| TRIM21-2F                  | GGTGAAGAGTGTCTGGAAAGGAGTGAGTCTTGGAACCT                                   | 672         | 56                    |
| TRIM21-2R                  | CCAGCCCGTCCTCAGTGGACAGAGGGTCAGGGGGGGT                                    |             |                       |
| PCV2-F (1)                 | TGTAGTATTCAAAGGGCACAGAGC                                                 | 131         | 60                    |
| PCV2-R (1)                 | CGGATATACTATCAAGCGAACCAC                                                 |             |                       |
| TRIM21-sgRNA1 *            | Forward: CACCGAAGCTTCACCTGTTCTGTA<br>Reverse: AAACCTACAGAACAGGTGAAGCTTC  | 24          | 58                    |
| TRIM21-sgRNA2 *            | Forward: CACCGTCGGCAGGTGGCCAACATGG<br>Reverse: AAACCCATGTTGGCCACCTGCCGAC | 24          |                       |
| TRIM21-KO-F                | CCTCACACAGCTCTTCTCATCGCCTTCTTTC                                          | 545         | 58                    |
| TRIM21-KO-R                | GCCTGCTCGTGCCCAGGTGCCTCCGGGCT                                            |             |                       |
| TRIM21-OE-F                | GTAACAACCTCCGCCCCATTGAC                                                  | 399         | 58                    |
| TRIM21-OE-R                | GCTTCTCTCCGTGCACCGCAC                                                    |             |                       |
| GAPDH-F                    | GCCATCACCATCTTCCAGG                                                      | 437         | 60                    |
| GAPDH-R                    | TCACGCCCATCACAAACAT                                                      |             |                       |
| MNDAL-F                    | CTCTCCTGACACCCAGAAATG                                                    | 90          | 60                    |
| MNDAL-R                    | CACTGTGGAAACCATCCTCT                                                     |             |                       |
| TNF-F                      | CACGTTGTAGCCAATGTCAAAG                                                   | 136         | 60                    |
| TNF-R                      | GAAGAGGACCTGGGAGTAGAT                                                    |             |                       |
| IL-6-F                     | ACCTGGACTACCTCCAGAAA                                                     | 111         | 60                    |
| IL-6-R                     | GGTGGCTTTGTCTGGATTCT                                                     |             |                       |
| IFN $\alpha$ -F            | CATCCTGGCTGTGAGGAAATA                                                    | 142         | 60                    |
| IFN $\alpha$ -R            | CCTTCTTCCTGAGTCTGTCTTG                                                   |             |                       |

|                 |                        |     |    |
|-----------------|------------------------|-----|----|
| IFN $\beta$ -F  | GGAGACAATCCTGGAGGAAATC | 104 | 60 |
| IFN $\beta$ -R  | TACTCCTTGGACTTCAGGTACT |     |    |
| IFN $\gamma$ -F | AGCCATCAGTGAATCATCAA   | 81  | 60 |
| IFN $\gamma$ -R | CTCTCTGGCCTTGGAACATAG  |     |    |

\* Note: sgRNAs were incubated at 95 °C for 5 min, followed by slow cooling to room temperature.

**Supplemental figures**

**Figure S1 Original Western images used for preparing Figure 1C.**

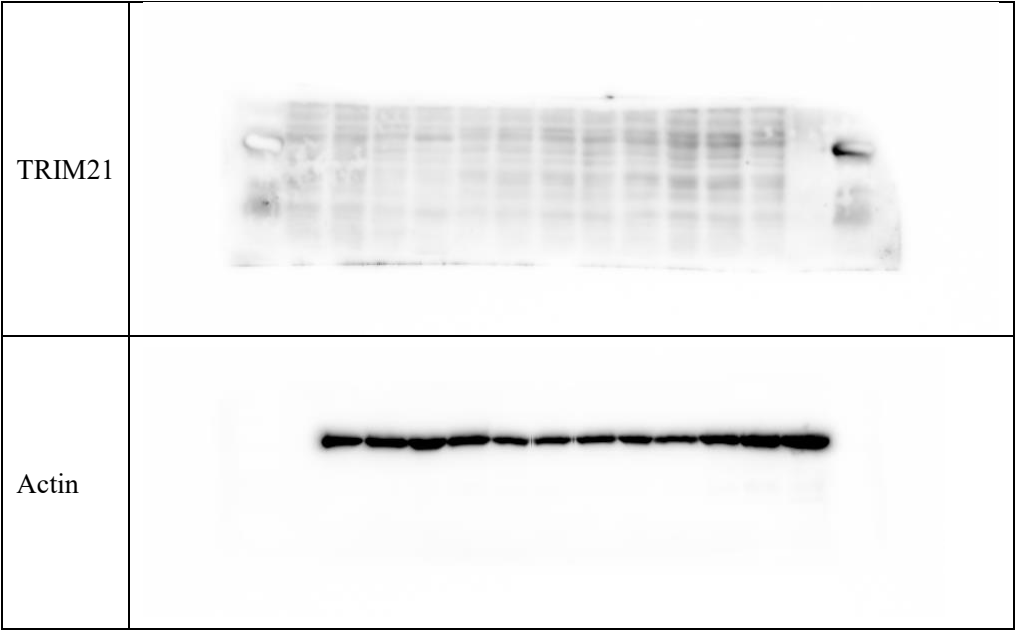

**Figure S2 Original Western images used for preparing Figure 2B and 2D.**

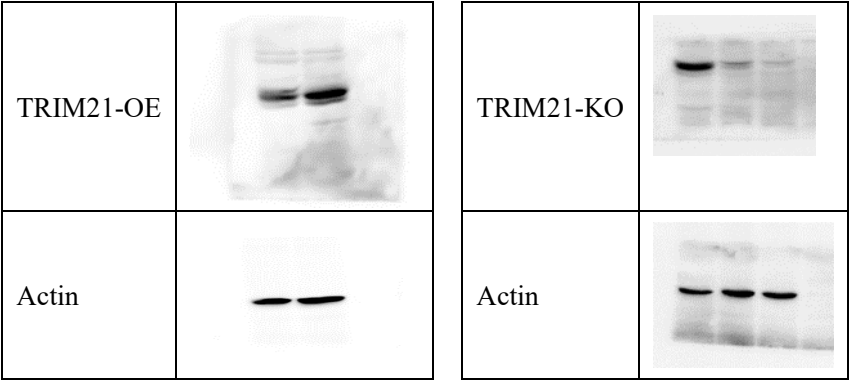

**Figure S3 Original Western images used for preparing Figure 3B.**

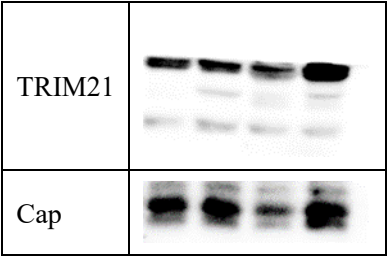

|       |                                                                                   |
|-------|-----------------------------------------------------------------------------------|
| Actin | 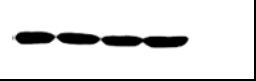 |
|-------|-----------------------------------------------------------------------------------|

Figure S4 Original Western images used for preparing Figure 4A and 4C.

|       |                                                                                   |        |                                                                                    |
|-------|-----------------------------------------------------------------------------------|--------|------------------------------------------------------------------------------------|
| P53   | 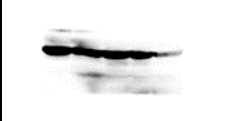 | TRIM21 |  |
| Actin |  | BCL-2  |  |
|       |                                                                                   | Actin  |  |

Figure S5 Original Western images used for preparing Figure 5A and 5B.

|               |                                                                                     |
|---------------|-------------------------------------------------------------------------------------|
| IFN- $\beta$  | 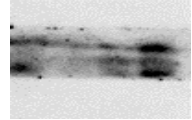 |
| IFN- $\gamma$ |  |
| IFN- $\alpha$ |  |
| Actin         |  |

Figure S6 Original Western images used for preparing Figure 6B and 6C.

|       |                                                                                     |       |                                                                                      |
|-------|-------------------------------------------------------------------------------------|-------|--------------------------------------------------------------------------------------|
| MNDAL |  | MNDAL |  |
|-------|-------------------------------------------------------------------------------------|-------|--------------------------------------------------------------------------------------|

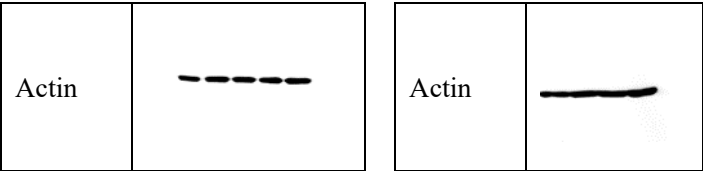

## Reference

1. Liu X, Ouyang T, Ouyang H, et al. Human cells are permissive for the productive infection of porcine circovirus type 2 in vitro. *Sci Rep* 2019;9:5638.
